# Supplementary material for: Topical application of an irreversible small molecule inhibitor of lysyl oxidases ameliorates skin scarring and fibrosis
Source: PubMed Central journal article supplement (PMC9500072; doi:10.1038/s41467-022-33148-5), 2022-09-22
Supplement: 41467_2022_33148_MOESM3_ESM.pdf [file 41467_2022_33148_MOESM3_ESM.pdf]

## **Description of Additional Supplementary Files**

**Supplementary Data 1:** LeadProfilingScreen (Eurofins Cerep Panlabs) for PXS-4787.

**Supplementary Data 2:** SafetyScreen (Eurofins Cerep Panlabs) for PXS-6302.
